# Supplementary material
Source: PubMed Central journal article supplement (PMC3320034)

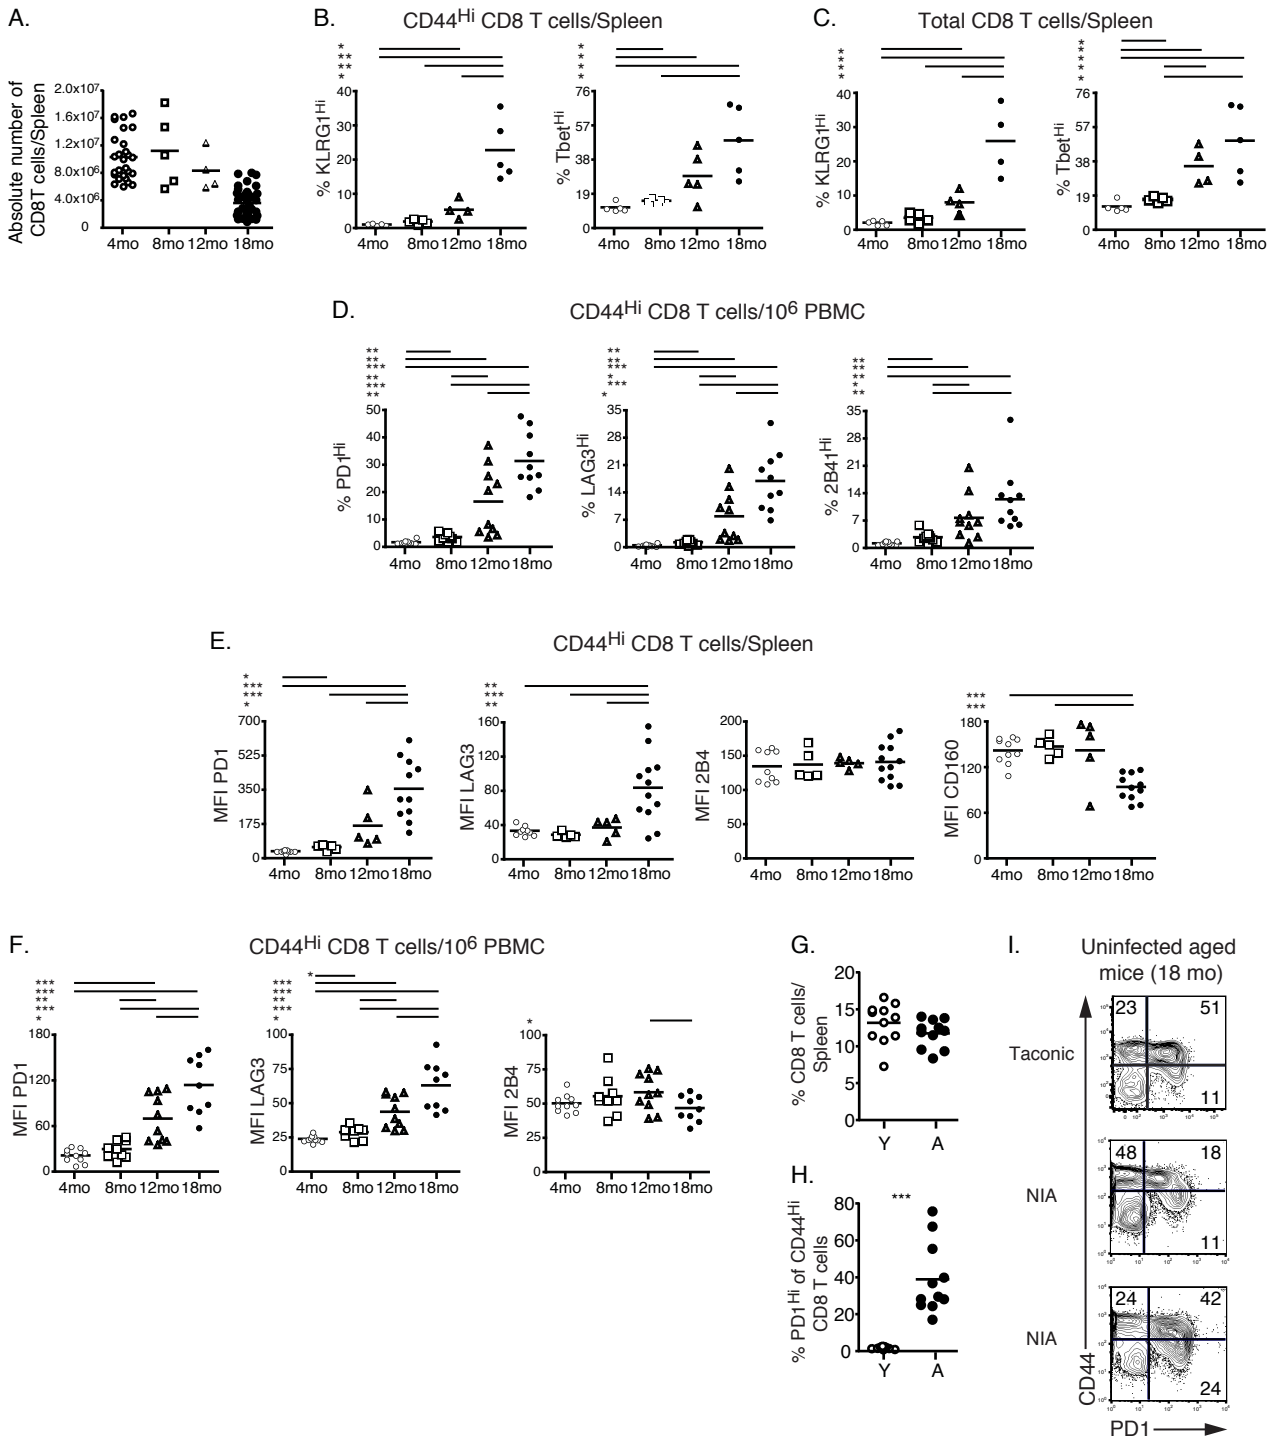

Supplement: NIHMS354007-supplement-2.pdf [file NIHMS354007-supplement-2.pdf]

Decman et al, Supplemental Figure 2

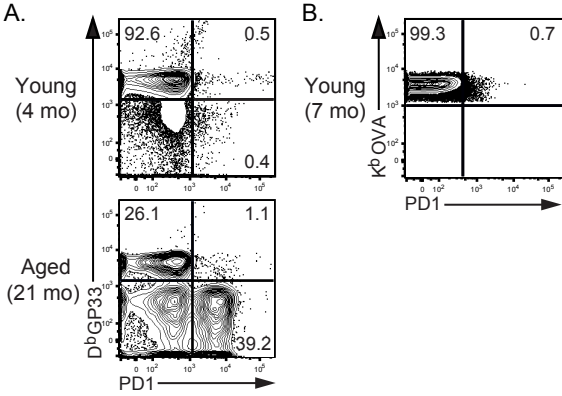

Supplement: NIHMS354007-supplement-3.pdf [file NIHMS354007-supplement-3.pdf]
